# Supplementary material
Source: PubMed Central journal article supplement (PMC5733275)
Supplement: ml7b00355_si_001.pdf [file ml7b00355_si_001.pdf]

## Supplementary Information

### Synthesis and Evaluation of A Radiolabeled Phosphoramidate Mustard with Selectivity for Hypoxic Cancer Cells

Wenting Zhang<sup>†,‡,§</sup>, Wei Fan<sup>†,‡,§</sup>, Zhengyuan Zhou<sup>¶</sup>, Jered Garrison<sup>†,§,||,\*</sup>

†. Department of Pharmaceutical Sciences, College of Pharmacy, University of Nebraska Medical Center, 985830 Nebraska Medical Center, Omaha, NE 68198, United States

§. Department of Biochemistry and Molecular Biology, College of Medicine, University of Nebraska Medical Center, 985870 Nebraska Medical Center, Omaha, NE 68198, United States

||. Center for Drug Delivery and Nanomedicine, University of Nebraska Medical Center, 985830 Nebraska Medical Center, Omaha, NE 68198, United States

‡. Eppley Cancer Center, University of Nebraska Medical Center, 985950 Nebraska Medical Center, Omaha, NE 68198, United States

¶. Department of Radiology and Duke University Medical Center, Durham, North Carolina, US

‡ These authors contributed equally to this work.

\* Corresponding author. Department of Pharmaceutical Sciences, College of Pharmacy, University of Nebraska Medical Center, 985830 Nebraska Medical Center, Omaha, NE 68198-5830, United states. Tel.: +1 402 559 3453 (office); fax: +1 402 559 9365. E-mail address: jcgarrison@unmc.edu

#### Supplementary contents

|                                                                                                                         |           |
|-------------------------------------------------------------------------------------------------------------------------|-----------|
| <b>Materials and methods.</b> .....                                                                                     | <b>2</b>  |
| <b>Scheme S1.</b> Synthesis of N-(2-bromoethyl)prop-2-yn-1-amine hydrochloride <b>9</b> . .....                         | <b>3</b>  |
| <b>Scheme S2.</b> Synthesis of asymmetric phosphoramidate mustard.....                                                  | <b>3</b>  |
| <b>Scheme S3.</b> Synthesis of imidazole and its nitro-derivative conjugated phosphoramidate mustard <b>1-3</b> . ..... | <b>3</b>  |
| <b>Experimental procedures for synthesizing compound 1 to 11.</b> .....                                                 | <b>4</b>  |
| <b>Table S1</b> Crystal data and structure refinement for compound <b>9</b> .....                                       | <b>7</b>  |
| <b>Fig. S1.</b> Crystal structure of side product compound <b>11</b> . .....                                            | <b>7</b>  |
| <b>Table S2</b> Crystal data and structure refinement for compound <b>11</b> .....                                      | <b>8</b>  |
| <b>Experimental procedures for hypoxia-selective cytotoxicity, radiolabeling and efflux study.</b> .....                | <b>8</b>  |
| <b>Fig. S2.</b> Mass spectrometry of compound <b>1-9, 13</b> and <b>14</b> . .....                                      | <b>10</b> |
| <b>Fig. S3.</b> <sup>1</sup> H-NMR spectra of compound <b>1-9</b> and <b>11</b> . .....                                 | <b>14</b> |
| <b>Fig. S4.</b> <sup>13</sup> C-NMR spectra of compound <b>3, 5-7, 9</b> and <b>11</b> . .....                          | <b>18</b> |
| <b>Fig. S5.</b> <sup>31</sup> P-NMR spectra of compound <b>1-3</b> and <b>11</b> . .....                                | <b>20</b> |

## Materials

Reagent: All solvents used for reactions and silica gel purification were ACS grade and purchased from Fisher Scientific, unless otherwise stated. Acetonitrile utilized for HPLC analysis and purification was HPLC grade and purchased from Fisher Scientific. Water was deionized by Millipore® Milli Q Biocell Ultrapure Water System before use. TLC silica gel 60 plate was purchased from EMD Millipore.  $\text{CDCl}_3$ , sodium hydride was obtained from ACROS Organics™. Dimethyl sulfoxide was obtained from Cambridge Isotope Laboratories. 4-(Dimethylamino) pyridine (DMAP), Cu (II) chloride, CuI, phosphorus (V) oxychloride, sodium sulfate and tetrabromomethane were obtained from Sigma-Aldrich. Boc anhydride was obtained from Chem-Impex International. Deuterium oxide and triphenylphosphine were purchased from Alfa Aesar®. 2-Bromoethylamine hydrobromide, alamarBlue®, ammonium chloride, ethanolamine, imidazole, L-glutamine, propargyl bromide, sodium chloride, tetrabutylammonium fluoride (TBAF) and triethylamine ( $\text{Et}_3\text{N}$ ) were obtained from Thermo Fisher. (1-Methyl-1H-imidazol-5-yl) was purchased from AstaTech. Tert-Butyldimethylchlorosilane (TBSCl) was purchased from Oakwood Chemical. (1-methyl-2-nitro-1H-imidazol-5-yl) methanol was purchased from ChiralStar.), Dulbecco's Modified Eagle Medium (DMEM), bovine serum albumin (BSA), hydrochloric acid and sulfuric acid, Kaighn's Modification of Ham's F-12 Medium (F-12K Medium), 4-(2-hydroxyethyl)-1-piperazineethanesulfonic acid (HEPES), Penicillin-Streptomycin, phosphate buffered saline (PBS) and silica gel (230-400 mesh) were obtained from Fisher Scientific. [ $^{125}\text{I}$ ] NaI was purchased from American Radiolabeled Chemicals, Inc. The human prostate cancer PC-3 (CRL-1435™) and DU145 (HTB-81™) was purchased from American Type Culture Collection.

Instrumentation: A Waters e2695 system equipped with a Waters 2489 absorption detector and a Waters Qtof Micro electrospray ionization mass spectrometer was used to perform high performance liquid chromatography/mass spectrometry analyses.  $^1\text{H}$ ,  $^{13}\text{C}$  and  $^{31}\text{P}$  NMR spectrums were recorded on a Bruker Avance-III HD 500 MHz instrument using as the solvent. Triphenylphosphite was used as  $^{31}\text{P}$  standard. A Phenomenex Jupiter 5u C18 300A 250× 10 mm semiprep column was used for the purification of 2-nitroimidazole phosphoramidate mustard and its controls. A Phenomenex Jupiter C12 Proteo 250×10 mm semiprep column was used for the purification of model compounds of 5-[ $^{125}\text{I}$ ]iodo-1,2,3-triazoles. Waters 1515 binary pump equipped with a Waters 2489 absorption detector and a Bioscan Flow Count radiometric detector system using a Phenomenex Jupiter C12 Proteo 250×4.6 mm column. Falcon™ Polystyrene Microplates (96-well plate and 6-well plate) were used for in vitro cytotoxicity assay and efflux study separately. SpectraMax® M5 Multi-Mode Microplate Readers was used to quantify fluorescence intensities. EVOS FL Cell Imaging System was used for time-dependent cytotoxicity assay. Hypoxic PC-3 and DU145 cells were incubated in hypoxic glove box with temperature,  $\text{CO}_2$  and humidity controller (Coy Laboratory Products INC, Grass Lake, MI). Gamma decay detection of  $^{125}\text{I}$  for the efflux studies was accomplished using a LTI (U.S.) Multi-Wiper nuclear medicine gamma counter.

## Methods

**Chemistry.** Compounds **1** through **9** were synthesized on the basis of reported methods.<sup>1-6</sup> The key intermediate compound **9** was successfully synthesized in 80% yield by a series of reactions as shown in **Scheme 1A**. Similar synthetic procedures were applied to the synthesis of both the negative control, imidazole phosphoramidate mustard **1** and the positive control, 2-nitroimidazole phosphoramidate mustard, **2** and are depicted in **Scheme 1B**. Briefly,  $\text{POCl}_3$  was reacted with 2 equiv of 2-bromoethylamine hydrobromide and the residue was purified several times by filtration through fiberglass. The filtrate was added to the suspension of (1-Methyl-1H-imidazol-5-yl)methanol or its 2-nitroimidazole derivatives in the presence of TEA for overnight. The products were purified by HPLC to produce **1** (13.8% yield) and **2** (11.7% yield). Compound **3** was synthesized by adding 0.5 eq of  $\text{PCl}_3$  to compound **9** following by conjugation of with (1-Methyl-2-nitro-1H-imidazol-5-yl)methanol and oxidation. Details of synthesis can be found in the following content.

## Schemes

**Scheme S1. Synthesis of N-(2-bromoethyl)prop-2-yn-1-amine hydrochloride 9<sup>a</sup>**

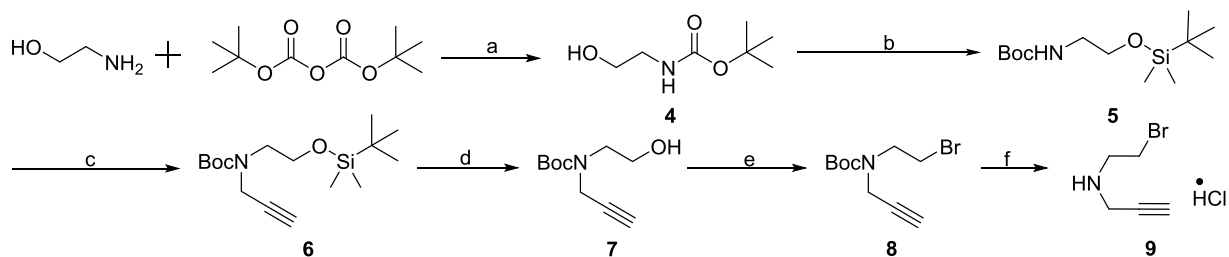

<sup>a</sup>Reagents, conditions, and yields: (a) Et<sub>3</sub>N, CH<sub>2</sub>Cl<sub>2</sub>, 96.0%; (b) Imidazole, 4-DAMP, TBDMSCl, CH<sub>2</sub>Cl<sub>2</sub>, 98.3%; (c) propargyl bromide, NaH, THF, 58.0%; (d) TBAF, THF, 85.0%; (e) CBr<sub>4</sub>, PPh<sub>3</sub>, ACN, 77.8%; (f) HCl (g), Et<sub>2</sub>O, 79.6%

**Scheme S2 Attempt to synthesize asymmetric phosphoramidate mustard<sup>a</sup>**

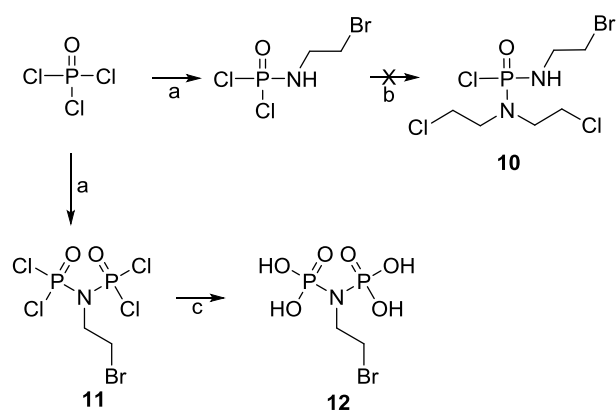

<sup>a</sup>Reagents, conditions, and yields: (a) propargyl bromide, Et<sub>2</sub>O, Et<sub>3</sub>N, -5°C; (b) Bis(2-chloroethyl)amine hydrochloride, ACN, Et<sub>3</sub>N, pyridine, 40°C; (c) H<sub>2</sub>O.

**Scheme S3. Synthesis of imidazole and its nitro-derivative conjugated phosphoramidate mustard (1-3)<sup>a</sup>**

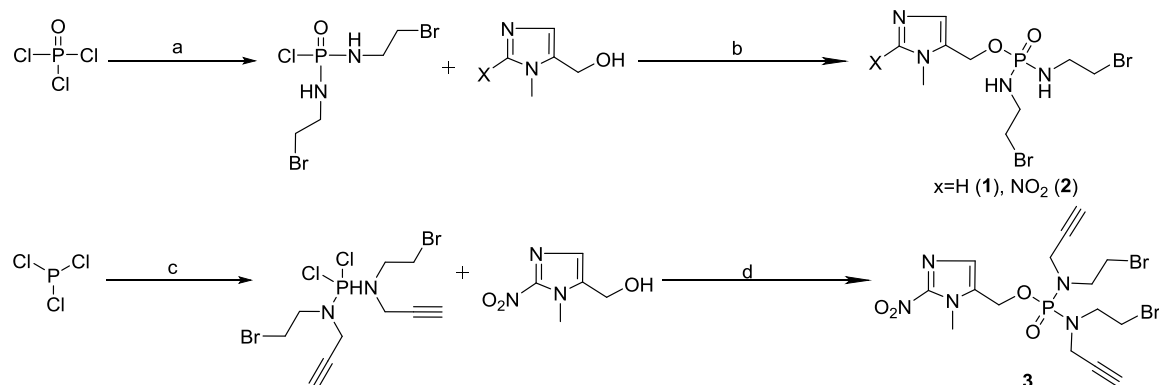

<sup>a</sup>Reagents, conditions, and yields: (a) propargyl bromide, Et<sub>3</sub>N, CH<sub>2</sub>Cl<sub>2</sub>; (b) Et<sub>3</sub>N, CH<sub>2</sub>Cl<sub>2</sub>, 13.8% (1), 11.7% (2); (c) compound 9, Et<sub>3</sub>N, CH<sub>2</sub>Cl<sub>2</sub>; (d) tert-butyl hydroperoxide, Et<sub>3</sub>N, CH<sub>2</sub>Cl<sub>2</sub>, 7.4% (3)

## Synthesis

<sup>1</sup>H spectra are reported as chemical shifts ( $\delta$ ) in ppm relative to TMS ( $\delta = 0$ ) and <sup>31</sup>P NMR are referenced to H<sub>3</sub>PO<sub>4</sub> ( $\delta = 0$ ).

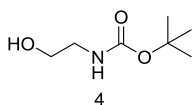

**tert-butyl(2-hydroxyethyl)carbamate (4).** To a stirred solution of ethanolamine (6.16 g, 100.8 mmol) in 200 mL dry CH<sub>2</sub>Cl<sub>2</sub> was added Et<sub>3</sub>N (19.2 mL, 137.46 mmol) at rt for 30 min and then the solution was cooled to 0 °C. To this, a solution of Boc<sub>2</sub>O (20.0 g, 91.64 mmol) in 60 mL of dry CH<sub>2</sub>Cl<sub>2</sub> was added dropwise and stirred at rt overnight. The mixture was quenched with saturated aqueous NH<sub>4</sub>Cl, and extracted with CH<sub>2</sub>Cl<sub>2</sub> three times. The combined organic extracts were dried over anhydrous Na<sub>2</sub>SO<sub>4</sub>, filtered and concentrated by rotary evaporation to yield **4** as a colorless oil (15.6 g, 96.8 mmol, 96.0%).

**R<sub>f</sub>**=0.31(12.5% Et<sub>2</sub>O/petroleum ether)

**<sup>1</sup>H NMR** (500 MHz, CDCl<sub>3</sub>):  $\delta$  5.10 (s, 1H), 3.66-3.65 (m, 2H), 3.25-3.25 (m, 2H), 3.02 (s, 1H), 1.42 (s, 9H).

**MS** (ESI+) *m/z* calcd for C<sub>7</sub>H<sub>15</sub>NO<sub>3</sub> [M+H]<sup>+</sup> 162.11, found 162.09.

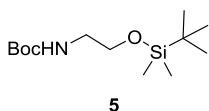

**tert-butyl(2-((tert-butyldimethylsilyloxy)ethyl)carbamate (5).** To a stirred solution of **4** (10 g, 62.03 mmol) and imidazole (12.67 g, 186.1 mmol) in 200 mL dry CH<sub>2</sub>Cl<sub>2</sub> with DMAP (0.4 g, 3.27 mmol), TBSCl (11.22 g, 74.44 mmol) was slowly added at 0 °C. The solution was warmed to rt and stirred overnight, then quenched with saturated aqueous NH<sub>4</sub>Cl solution. The mixture was extracted

three times with CH<sub>2</sub>Cl<sub>2</sub> and the combined organic layers were dried over anhydrous Na<sub>2</sub>SO<sub>4</sub>, filtered and the solvent removed by rotary evaporation. The product was purified via flash column chromatography on silica gel using 20% Et<sub>2</sub>O in petroleum ether to elute **5** (16.8 g, 98.3%) as a clear colorless oil.

**R<sub>f</sub>**=0.47(20% Et<sub>2</sub>O/ petroleum ether).

**<sup>1</sup>H NMR** (500 MHz, CDCl<sub>3</sub>):  $\delta$  4.84 (br, 1H), 3.65 (m, 2H), 3.22 (m, 2H), 1.44 (s, 9H), 0.89 (s, 9H), 0.054 (s, 6H).

**<sup>13</sup>C NMR** (125 MHz, CDCl<sub>3</sub>)  $\delta$  155.96, 79.12, 62.26, 42.88, 28.41, 25.89, 18.30, -2.96, -5.37.

**MS** (ESI+) *m/z* calcd for C<sub>13</sub>H<sub>29</sub>NO<sub>3</sub>Si [M+H]<sup>+</sup> 276.19, found 276.05.

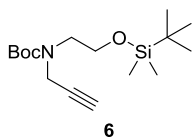

**tert-butyl(2-((tert-butyldimethylsilyloxy)ethyl)(prop-2-yn-1-yl)carbamate (6).** To a suspension of NaH (2.9 g, 72.61 mmol) in 100mL dry THF was added a solution of **5** (10 g, 36.3 mmol) in 30 mL dry THF at 0 °C. The mixture was stirred at rt for 1.5 h and subsequently cooled down to 0 °C. To this reaction mixture propargyl bromide (13.7 mL of an 80% wt solution in toluene, 90.76 mmol) was

added dropwise. Allowing to warm to rt, the reaction mixture was stirred overnight and quenched with 50mL MeOH followed by 100 mL water. The aqueous layer was extracted three times with CH<sub>2</sub>Cl<sub>2</sub> and the combined organic layers were dried over anhydrous Na<sub>2</sub>SO<sub>4</sub>, filtered and the solvent removed by rotary evaporation. The product was purified via flash column chromatography on silica gel using (2% Et<sub>2</sub>O in petroleum ether) to provide **6** (6.6 g, 58.0%) as clear colorless oil.

**R<sub>f</sub>**=0.38(20% Et<sub>2</sub>O/ acetone)

**<sup>1</sup>H NMR** (500 MHz, CDCl<sub>3</sub>):  $\delta$  4.16 (d, 2H), 3.74 (s, 2H), 3.42 (s, 2H), 2.18 (s, 1H), 1.47 (s, 9H), 0.89 (s, 9H), 0.049 (s, 6H).

**<sup>13</sup>C NMR** (125 MHz, CDCl<sub>3</sub>):  $\delta$  155.93, 80.09, 79.05, 62.24, 48.47, 43.08, 38.08, 32.25, 28.39, 25.87, 18.28, -5.39.

**HRMS** (ESI+) *m/z* calcd for C<sub>16</sub>H<sub>31</sub>NO<sub>3</sub>Si [M+H]<sup>+</sup> 314.2151, found 314.2155.

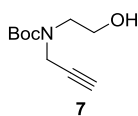

**tert-butyl(2-hydroxyethyl)(prop-2-yn-1-yl)carbamate (7).** To a solution of **6** (5 g, 15.95 mmol) in 100 mL CH<sub>2</sub>Cl<sub>2</sub> was added TBAF (1M in THF) (22.33 mL, 22.33 mmol) at 0 °C. The reaction mixture was stirred overnight at rt and quenched with saturated aqueous NH<sub>4</sub>Cl solution, extracted three times with CH<sub>2</sub>Cl<sub>2</sub>. The organic layers were dried over anhydrous Na<sub>2</sub>SO<sub>4</sub>, filtered and the solvent was removed by

rotary evaporation. The product was purified via flash column chromatography on silica gel using 20% acetone in

petroleum ether as the eluent to provide **7** (2.7 g, 85.0%) as a clear light yellow oil.

**R<sub>f</sub>**=0.54(50% Et<sub>2</sub>O/ acetone)

**<sup>1</sup>H NMR** (500 MHz, CDCl<sub>3</sub>): δ 4.09 (br, 2H), 3.82 (m, 2H), 3.52 (m, 2H), **2.75 (br, 1H)**, 2.27 (s, 1H), 1.50 (s, 9H).

**<sup>13</sup>C NMR** (125 MHz, CDCl<sub>3</sub>): δ 207.11, 156.82, 79.54, 71.60, 62.45, 43.13, 30.88, 28.35.

**MS** (ESI+) *m/z* calcd for C<sub>10</sub>H<sub>17</sub>NO<sub>3</sub> [M+H]<sup>+</sup> 200.12, found 200.14.

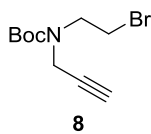

**tert-butyl(2-bromoethyl)(prop-2-yn-1-yl)carbamate (8).** To a solution of **7** (2 g, 10.04 mmol) and of triphenylphosphine (3.42 g, 13.05 mmol) in 50 mL dry THF a solution of carbon tetrabromide (4.33 g, 13.05 mmol) in 30 mL acetonitrile was added dropwise while the reaction temperature was slightly above ambient (be specific). The reaction was stirred for 2h, and the solvent was removed by rotor evaporation.

The residue was purified via flash column chromatography on silica gel using 20% acetone in petroleum ether as the eluent to provide **8** (2.04 g, 77.8%) as clear light yellow oil. The product **8** was immediately used in next step synthesis.

**<sup>1</sup>H NMR** (500 MHz, CDCl<sub>3</sub>): δ 4.15 (dd, 2H), 3.69 (m, 2H), 3.51 (br, 2H), 2.24 (s, 1H), 1.48 (s, 9H).

**MS** (ESI+) *m/z* calcd for C<sub>10</sub>H<sub>16</sub>BrNO<sub>2</sub> [M+H]<sup>+</sup> 262.04, found 261.91.

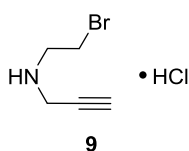

**N-(2-bromoethyl)prop-2-yn-1-amine hydrochloride (9).** To a solution of **8** (0.5 g, 1.92 mmol) in 50 mL Et<sub>2</sub>O was added anhydrous hydrogen chloride gas at 0 °C continuously for 3h. **9** (0.3 g, 79.6%) gradually precipitate out of solution as a white solid. The product was filtrated to remove solvent and used for the next reaction without further purification.

**<sup>1</sup>H NMR** (500 MHz, DMSO-*d*<sub>6</sub>): 9.3245 (s, 2H), 3.99-3.98 (d, 2H), 3.90-3.88 (t, 2H), 3.77 (s, 1H).

**<sup>13</sup>C NMR** (125 MHz, DMSO-*d*<sub>6</sub>): δ 80.229, 75.331, 47.622, 36.193, 27.045.

**HRMS** (ESI+) *m/z* calcd for free base C<sub>5</sub>H<sub>8</sub>NBr [M+H]<sup>+</sup> 161.9918, found 161.9921.

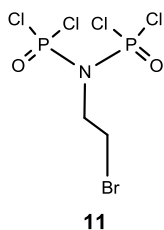

**(2-bromoethyl)(dichlorophosphoryl)phosphoramidic dichloride (11).** To a suspension of 2-Bromoethylamine hydrobromide (3 g, 14.6 mmol) in 50mL Et<sub>2</sub>O was added POCl<sub>3</sub> (1.4 mL, 14.64 mmol) slowly at -5°C with stirring. Et<sub>3</sub>N (4.08 mL, 97.61 mmol) was added and the reaction mixture was allowed to stir overnight. The solution was filtered and the filtrate was concentrated down. The residue was purified by distillation to provide **8** (2.7 g, 85%) as white crystal.

**<sup>1</sup>H NMR** (500 MHz, CDCl<sub>3</sub>): δ 4.13-4.03 (m, 2H), 3.73-3.70 (t, 2H).

**<sup>13</sup>C NMR** (125 MHz, CDCl<sub>3</sub>): δ 50.41, 26.25.

**<sup>31</sup>P NMR** (202 MHz, CDCl<sub>3</sub>): δ 9.44.

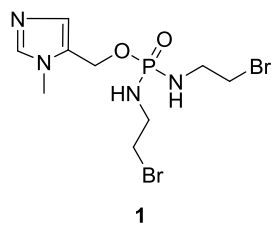

**1-Methyl-1H-imidazol-5-yl)methyl N,N-bis(2-bromoethyl)phosphordiamide (1).** To a suspension of 2-Bromoethylamine hydrobromide (10 g, 48.8 mmol) in 100 mL CH<sub>2</sub>Cl<sub>2</sub> was added POCl<sub>3</sub> (2.28 mL, 24.4 mmol) slowly at -15°C with vigorous stirring. To this reaction mixture a solution of Et<sub>3</sub>N (10.96 mL, 97.6 mmol) in 50 mL CH<sub>2</sub>Cl<sub>2</sub> was added dropwise, followed by stirring at -10 °C for 2h. The solid residue was filtered and washed with small amount (how much?) of cold CH<sub>2</sub>Cl<sub>2</sub>, and the filtrate was concentrated by rotor evaporation to

about 20 mL. The residue was filtered and washed with cold CH<sub>2</sub>Cl<sub>2</sub> again. The resulting filtrate was concentrated down by rotor evaporation. To a suspension of (1-Methyl-1H-imidazol-5-yl)methanol (27.5 mg, 0.25 mmol) in 5 mL CH<sub>2</sub>Cl<sub>2</sub> was added solution of the residue (20 mg in 5 mL CH<sub>2</sub>Cl<sub>2</sub>) from the previous step at 0 °C. To the reaction mixture Et<sub>3</sub>N (16.9 mg, 0.167 mmol) in 2 mL CH<sub>2</sub>Cl<sub>2</sub> was added t, and stirred overnight at 0 °C?. The solvent was removed by rotor evaporation. The residue was purified by a semi-preparative Jupiter 5u C18 HPLC column with a flow rate of 5.0 mL/min. The final yields of **1** was 13.8% (3.4 mg) as colorless oil.

**<sup>1</sup>H NMR** (500 MHz, DMSO-*d*<sub>6</sub>): δ 7.63 (s, 1H), 6.938 (s, 1H), 4.91-4.84 (m, 4H), 3.63 (m, 3H), 3.40 (m, 4H), 3.09 (m, 4H).

**<sup>31</sup>P NMR** (202 MHz, DMSO-*d*<sub>6</sub>): δ 14.82.

**MS** (ESI+) *m/z* calcd for C<sub>9</sub>H<sub>17</sub>Br<sub>2</sub>N<sub>4</sub>O<sub>2</sub>P [M+H]<sup>+</sup> 402.95, found 402.95.

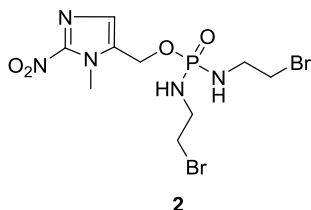

**1-Methyl-2-nitro-1*H*-imidazol-5-yl)methyl *N,N*-bis(2-bromoethyl)phosphordiamidate (2).**

Compound **2** was synthesized by the same synthetic procedure as **1** and obtained as a yellow oil in 11.7% yield.

**<sup>1</sup>H NMR** (500 MHz, DMSO-*d*<sub>6</sub>): δ 7.24 (s, 1H), 4.98-4.96 (m, 4H), 3.93 (m, 3H), 3.41 (m, 4H), 2.88 (m, 4H).

**<sup>31</sup>P NMR** (202 MHz, DMSO-*d*<sub>6</sub>): δ 15.30.

**HRMS** (ESI+) *m/z* calcd for C<sub>9</sub>H<sub>16</sub>Br<sub>2</sub>N<sub>5</sub>O<sub>4</sub>P [M+H]<sup>+</sup> 447.9385, found 447.9382.

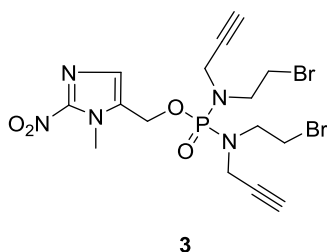

**1-Methyl-2-nitro-1*H*-imidazol-5-yl)methyl *N,N*-bis((2-bromoethyl)prop-2-yn)phosphordiamidate (3).**

To a suspension of Compound **9** (94.6 mg, 0.484 mmol) in 0 mL CH<sub>2</sub>Cl<sub>2</sub> was added phosphorus trichloride (30 mg, 0.22 mmol) at room temperature, followed by the addition of TEA (397.9 mg, 3.93 mmol) in 10 mL CH<sub>2</sub>Cl<sub>2</sub> dropwise. The reaction mixture was stirred at room temperature for 1h and then (1-Methyl-2-nitro-1*H*-imidazol-5-yl)methanol (41.2 mg, 0.26 mmol) in 5 mL CH<sub>2</sub>Cl<sub>2</sub> was added. After stirring for another 2h, the reaction mixture was cooled to -20°C and the tert-butyl hydroperoxide

(48 μL, 0.26 mmol, 5M in decane) was added. The solution was warmed to room temperature and stirred for 1h. The reaction mixture was quenched with saturated aqueous NH<sub>4</sub>Cl solution, extracted three times with CH<sub>2</sub>Cl<sub>2</sub>. The organic layers were dried over anhydrous Na<sub>2</sub>SO<sub>4</sub>, filtered and the solvent was removed by rotary evaporation. The residue was purified by a semi-preparative Jupiter 5u C18 HPLC column with a flow rate of 5.0 mL/min. The final yields of **3** was 7.4% (8.4 mg) as yellow oil.

**<sup>1</sup>H NMR** (500 MHz, CDCl<sub>3</sub>): δ 5.15-5.14(d, 2H), 4.10 (s, 3H), 3.93-3.82 (m, 8H), 3.52 (m, 4H), 2.35 (m, 2H).

**<sup>31</sup>P NMR** (202 MHz, CDCl<sub>3</sub>): δ 15.62.

**<sup>13</sup>C NMR** (125 MHz, CDCl<sub>3</sub>): δ 129.44, 78.95, 73.39, 56.58, 47.81, 36.28, 34.52, 29.41.

**HRMS** (ESI+) *m/z* calcd for C<sub>15</sub>H<sub>20</sub>Br<sub>2</sub>N<sub>5</sub>O<sub>4</sub>P [M+Na]<sup>+</sup> 546.9698, found 546.9689.

**X-Ray Crystallographic Analysis.** The single crystal generated from synthesis was stored in -80°C before characterization. Crystal data for compound **9**: C<sub>6</sub>H<sub>9</sub>NBr<sub>6</sub>, MW = 574.60 g/mol, orthorhombic, space group P2<sub>1</sub>2<sub>1</sub>2<sub>1</sub>, *a* = 7.30499(16) Å, *b* = 11.3505(2) Å, *c* = 16.9283(3) Å, α = β = γ = 90°, *V* = 1403.62(5) Å<sup>3</sup>, *Z* = 4, *D*<sub>calc</sub> = 2.719 g/cm<sup>3</sup>, μ = 20.381 mm<sup>-1</sup>, *T* = 100 (2) K, Data was collected on a Bruker SMART 1K CCD. Refinement of data with *I* > 2σ(*I*) (2909 independent reflections, *R*<sub>int</sub> = 0.0758) gave a *R*<sub>1</sub>(*F*) = 0.0346 and a *wR*<sub>2</sub>(*F*<sup>2</sup>) = 0.0925 for all data with a GOF = 1.061. Crystallographic data for the structural analysis has been deposited with the Cambridge Crystallographic Data Center (CCDC 1566695). **Crystal data for compound 11**: C<sub>2</sub>H<sub>4</sub>Br<sub>1</sub>C<sub>14</sub>N<sub>1</sub>O<sub>2</sub>P<sub>2</sub>, MW = 354.71 g/mol, orthorhombic, space group P2<sub>1</sub>/c, *a* = 11.2875(5) Å, *b* = 7.8601(4) Å, *c* = 12.5373(6) Å, α = γ = 90°, β = 102.528(5)°, *V* = 1085.84(9) Å<sup>3</sup>, *Z* = 4, *T* = 100 (2) K, *D*<sub>calc</sub> = 2.191 g/cm<sup>3</sup>, μ = 16.776 mm<sup>-1</sup>, Data was collected on a Bruker SMART 1K CCD. Refinement of data with *I* > 2σ(*I*) (2212 unique reflections, *R*<sub>int</sub> = 0.048) gave a *R*<sub>1</sub>(*F*) = 0.0464 and a *wR*<sub>2</sub>(*F*<sup>2</sup>) = 0.1524 for all data with a GOF = 1.176. Crystallographic data for the structural analysis has been deposited with the Cambridge Crystallographic Data Center (CCDC 1566696). Copies of this information may be obtained free of charge from the CCDC (www: http://www.ccdc.cam.ac.uk) or from e-mail [jcgarrison@unmc.edu](mailto:jcgarrison@unmc.edu).

**Table S1 Crystal data and structure refinement for compound 9.**

|                                                |                                                               |            |
|------------------------------------------------|---------------------------------------------------------------|------------|
| Identification code                            | wenting-1                                                     |            |
| Empirical formula                              | C <sub>5</sub> H <sub>8</sub> NBr <sub>6</sub>                |            |
| Formula weight                                 | 574.6                                                         |            |
| Temperature/K                                  | 100                                                           |            |
| Crystal system                                 | orthorhombic                                                  |            |
| Space group                                    | P2 <sub>1</sub> 2 <sub>1</sub> 2 <sub>1</sub>                 |            |
| Unit cell dimensions                           | a/Å= 7.30499(16)                                              | α/°= 90.00 |
|                                                | b/Å= 11.3505(2)                                               | β/°= 90.00 |
|                                                | c/Å= 16.9283(3)                                               | γ/°= 90.00 |
| Volume/Å <sup>3</sup>                          | 1403.62(5)                                                    |            |
| Z                                              | 4                                                             |            |
| Density (calculated) g/cm <sup>3</sup>         | 2.719                                                         |            |
| Absorption coefficient /mm <sup>-1</sup>       | 20.381                                                        |            |
| F (000)                                        | 1048.0                                                        |            |
| Crystal size/mm <sup>3</sup>                   | 0.4 × 0.05 × 0.05                                             |            |
| Index ranges                                   | -9 ≤ h ≤ 8, -14 ≤ k ≤ 13, -21 ≤ l ≤ 21                        |            |
| Reflections collected                          | 21627                                                         |            |
| Independent reflections                        | 2909 [R <sub>int</sub> = 0.0758, R <sub>sigma</sub> = 0.0346] |            |
| Radiation                                      | CuKα (λ = 1.54184)                                            |            |
| 2θ range for data collection/°                 | 9.38 to 152.66                                                |            |
| Data / restraints / parameters                 | 2909/0/118                                                    |            |
| Goodness-of-fit on F <sup>2</sup>              | 1.061                                                         |            |
| Final R indices [I ≥ 2σ (I)]                   | R <sub>1</sub> = 0.0346, wR <sub>2</sub> = 0.0907             |            |
| R indices (all data)                           | R <sub>1</sub> = 0.0369, wR <sub>2</sub> = 0.0925             |            |
| Largest diff. peak and hole/ e.Å <sup>-3</sup> | 0.94 and -0.58                                                |            |

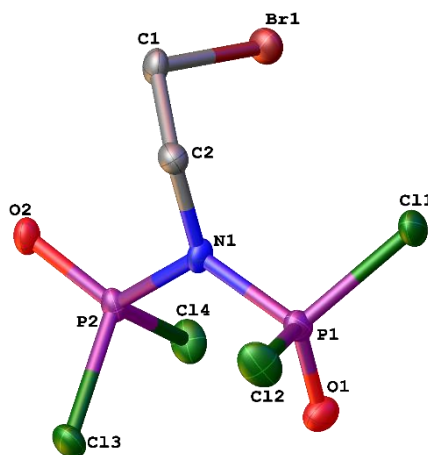**Figure S1** Crystal structure of side product **11**

**Table S2 Crystal data and structure refinement for compound 11.**

|                                                |                                                                                 |                |
|------------------------------------------------|---------------------------------------------------------------------------------|----------------|
| Identification code                            | JG                                                                              |                |
| Empirical formula                              | C <sub>2</sub> H <sub>4</sub> NO <sub>2</sub> P <sub>2</sub> Cl <sub>4</sub> Br |                |
| Formula weight                                 | 357.71                                                                          |                |
| Temperature/K                                  | 100                                                                             |                |
| Crystal system                                 | monoclinic                                                                      |                |
| Space group                                    | P2 <sub>1</sub> /c                                                              |                |
| Unit cell dimensions                           | a/Å= 11.2852(7)                                                                 | α/°= 90.00     |
|                                                | b/Å= 7.8547(5)                                                                  | β/°=102.540(7) |
|                                                | c/Å= 12.5336(9)                                                                 | γ/°= 90.00     |
| Volume/Å <sup>3</sup>                          | 1084.49(12)                                                                     |                |
| Z                                              | 4                                                                               |                |
| Density (calculated) g/cm <sup>3</sup>         | 2.191                                                                           |                |
| Absorption coefficient /mm <sup>-1</sup>       | 16.776                                                                          |                |
| F (000)                                        | 688.0                                                                           |                |
| Crystal size/mm <sup>3</sup>                   | 0.2 × 0.06 × 0.03                                                               |                |
| Index ranges                                   | -9 ≤ h ≤ 14, -9 ≤ k ≤ 9, -15 ≤ l ≤ 13                                           |                |
| Reflections collected                          | 7033                                                                            |                |
| Independent reflections                        | 2212 [R <sub>int</sub> = 0.0480, R <sub>sigma</sub> = 0.0378]                   |                |
| Radiation                                      | CuKα (λ = 1.54184)                                                              |                |
| 2θ range for data collection/°                 | 8.026 to 152.386                                                                |                |
| Data / restraints / parameters                 | 2212/0/109                                                                      |                |
| Goodness-of-fit on F <sup>2</sup>              | 1.176                                                                           |                |
| Final R indices [I ≥ 2σ (I)]                   | R <sub>1</sub> = 0.0464, wR <sub>2</sub> = 0.1409                               |                |
| R indices (all data)                           | R <sub>1</sub> = 0.0502, wR <sub>2</sub> = 0.1524                               |                |
| Largest diff. peak and hole/ e.Å <sup>-3</sup> | 0.81 and -1.01                                                                  |                |

**In vitro cytotoxicity study.** PC-3 and DU145 cells were separately cultured in F-12K and DMEM medium supplemented with 10% fetal bovine serum, 2.5 mM L-glutamine, 15 mM HEPES and 1% penicillin/streptomycin. Cells were seeded 24h before the experiment in 96-well plates at a density of 15,000/mL with 200μL medium of PC-3 cells and 12,500/mL with 200μL medium. On the day of the experiment, serial dilutions of the test compound with medium were administrated to cells. The plates were incubated for 2h, or longer if indicated, under either normoxic (95% air, 5% CO<sub>2</sub>) or hypoxic (94.9% N<sub>2</sub>, 0.1% O<sub>2</sub>, 5% CO<sub>2</sub>) conditions. After washing with fresh medium, cells were cultured for 72h in 200μL complete medium under normoxic conditions. Cell viability was determined by AlamarBlue. The 50% inhibitory concentration (IC<sub>50</sub>) of the test compound relative to the untreated control were calculated by Graphpad PRISM 5.

**Radiolabeling of 2-NIPAM.** The general procedure for the preparation of <sup>125</sup>I-labeled Azide-Alkyne Cycloaddition conjugates were adapted from previous reported synthetic strategy.<sup>7</sup> To 1.2 mL anhydrous acetonitrile, copper(II) chloride (4.02 mg, 30 μmol) was added to make CuCl<sub>2</sub>/TEA solution. To this mixture, anhydrous triethylamine (4.53 mg, 45 μmol) was added and sonicated until a clear burgundy solution was formed. The solution was gently mixed before adding slowly over 5 min a solution of 2-NIPAM (0.1 μmol) in 20 μL acetonitrile. To this mixture, Na<sup>125</sup>I (7.4 MBq) in 6.5 μL H<sub>2</sub>O was added followed by the addition of another 0.5 μL benzyle azide in 20 μL of anhydrous acetonitrile. The resultant solution was heated at 60 °C for 90 min. The purification of the radiolabeled azide-alkyne cycloaddition conjugates was performed by using RP-HPLC (≥10%).

**Distribution Coefficient.** The distribution coefficient was determined (n = 5) for each <sup>125</sup>I-labeled radioconjugate. In



a 1.5 mL centrifuge tube, 0.5 mL of 1-octanol was added to 0.5 mL of phosphate-buffered saline (pH 7.4) containing the radiolabeled peptide (400 000 cpm). The solution was vigorously stirred for 2 min at room temperature and subsequently centrifuged (8000g, 5 min) to yield two immiscible layers. Aliquots of 100  $\mu$ L were taken from each layer, and the radioactivity of each was quantified by an LTI (Elburn, IL) Multi-Wiper nuclear medicine gamma counter.

**In vitro efflux study.** PC-3 and DU145 cells were incubated in 6-well plates ( $0.5 \times 10^6$ /well) under normoxic (95% air, 5% CO<sub>2</sub>) or hypoxic (94.9 % N<sub>2</sub>, 0.1 % O<sub>2</sub>, 5 % CO<sub>2</sub>) conditions overnight in RPMI 1640 media (pH 7.4, 4.8 mg/mL HEPES, and 2 mg/mL BSA). On the day of the experiment, the medium was replaced with fresh medium and incubated for 2 h under normoxic or hypoxic conditions, respectively. The cells were pre-incubated for 2h at 37 °C in the presence of 100,000 cpm of <sup>125</sup>I-radioconjugates. Upon completion of the incubation, cells were washed thrice with medium to discard the unbound peptide. At time points 1, 2, 4, 6 and 8 h, the medium was harvested for quantitative analysis as the effluxed ligand. Surface bound radioactivity was collected by washing the cells twice with an acid wash (50 mM glycine-HCl/0.1 M NaCl buffer, pH 2.8). The cells were then lysed at 37 °C using a 10% aqueous SDS solution and the lysates were collected as internalized ligand. The radioactivity of the effluxed, surface bounded and internalized fractions for each radioconjugate was determined using a Multi Viper gamma counter. Statistical analyses were performed by two-way analysis of variance (ANOVA) using Graphpad PRISM 5 (U.S.).

**Statistical Analysis.** IC<sub>50</sub> values were determined by nonlinear regression using the 1-binding-site model of GraphPad PRISM 5 (GraphPad Software, Inc). Comparisons of the 2 groups for efflux studies were analyzed by the 2-tailed Student t test, and P values of less than 0.05 were considered statistically significant.

(1) Duan, J.-X.; Jiao, H.; Kaizerman, J.; Stanton, T.; Evans, J. W.; Lan, L.; Lorente, G.; Banica, M.; Jung, D.; Wang, J. Potent and highly selective hypoxia-activated achiral phosphoramidate mustards as anticancer drugs. *Journal of Medicinal Chemistry* **2008**, *51*, 2412-2420.

(2) Cambeiro, F.; Lopez, S.; Varela, J. A.; Saa, C. Vinyl dihydropyrans and dihydrooxazines: cyclizations of catalytic ruthenium carbenes derived from alkynals and alkynones. *Angew Chem Int Ed Engl* **2014**, *53*, 5959-5963.

(3) Molander, G. A.; Cormier, E. P. Ketyl-allene cyclizations promoted by samarium(II) iodide. *J Org Chem* **2005**, *70*, 2622-2626.

(4) Rengasamy, R.; Curtis-Long, M. J.; Seo, W. D.; Jeong, S. H.; Jeong, I. Y.; Park, K. H. New building block for polyhydroxylated piperidine: total synthesis of 1,6-dideoxynojirimycin. *J Org Chem* **2008**, *73*, 2898-2901.

(5) Fedotenko, I. A., Zaffalon, P. L., Favarger, F., & Zumbuehl, A. The synthesis of 1, 3-diamidophospholipids. *Tetrahedron Letters* **2010**, *51*, 5382-5384.

(6) Vedejs, E., & Stults, J. S. Synthesis of azocine derivatives from thio aldehyde Diels-Alder adducts. *The Journal of Organic Chemistry* **1988**, *53*, 2226-2232.

(7) Yan, R.; Sander, K.; Galante, E.; Rajkumar, V.; Badar, A.; Robson, M.; El-Emir, E.; Lythgoe, M. F.; Pedley, R. B.; Arstad, E. A one-pot three-component radiochemical reaction for rapid assembly of <sup>125</sup>I-labeled molecular probes. *Journal of the American Chemical Society* **2013**, *135*, 703-709.

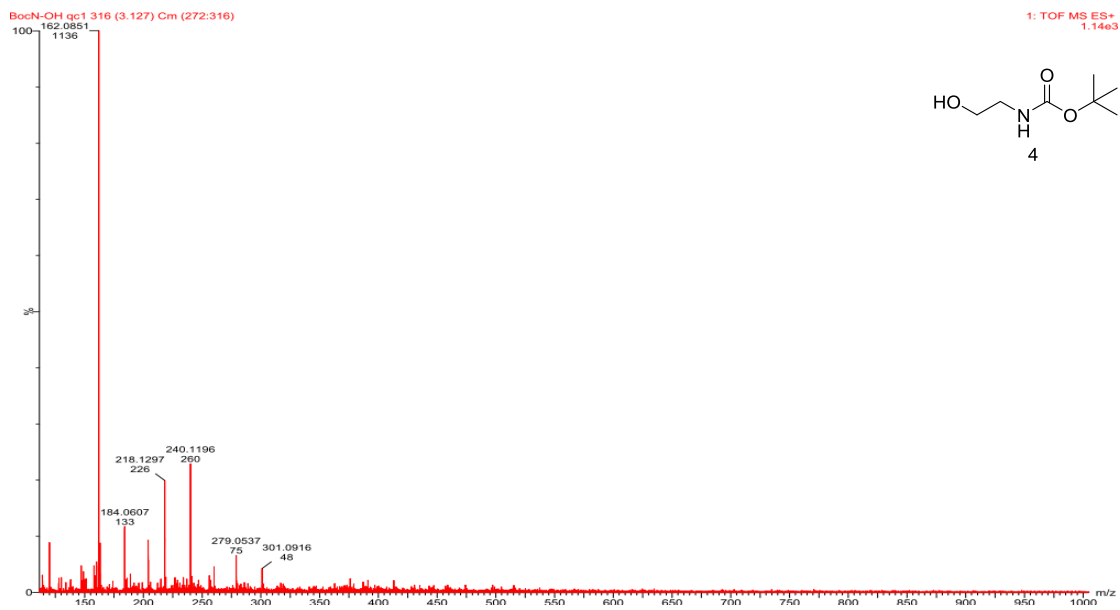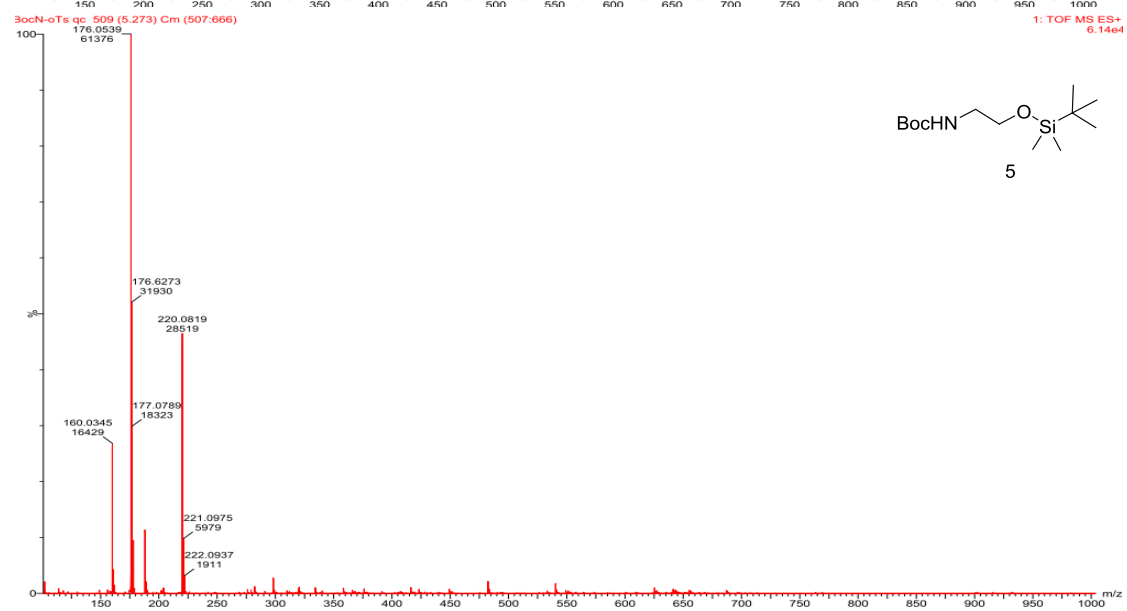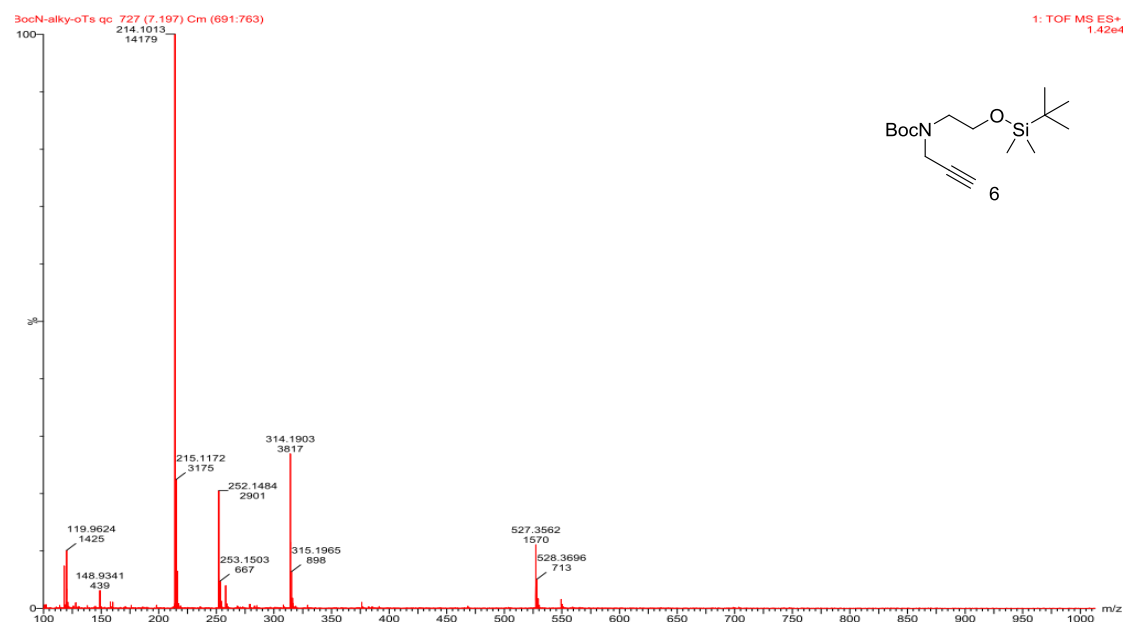

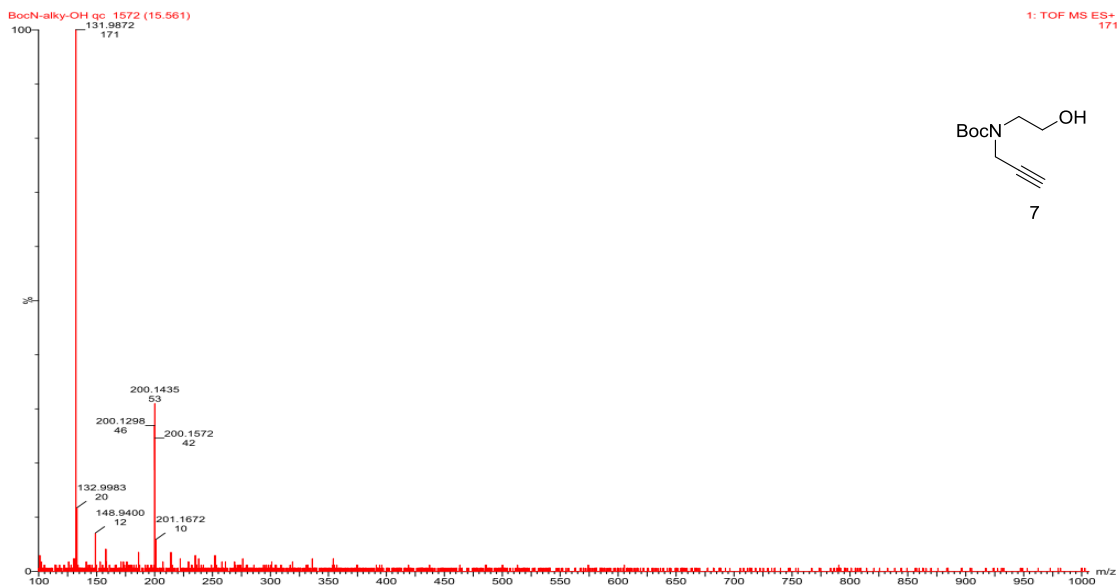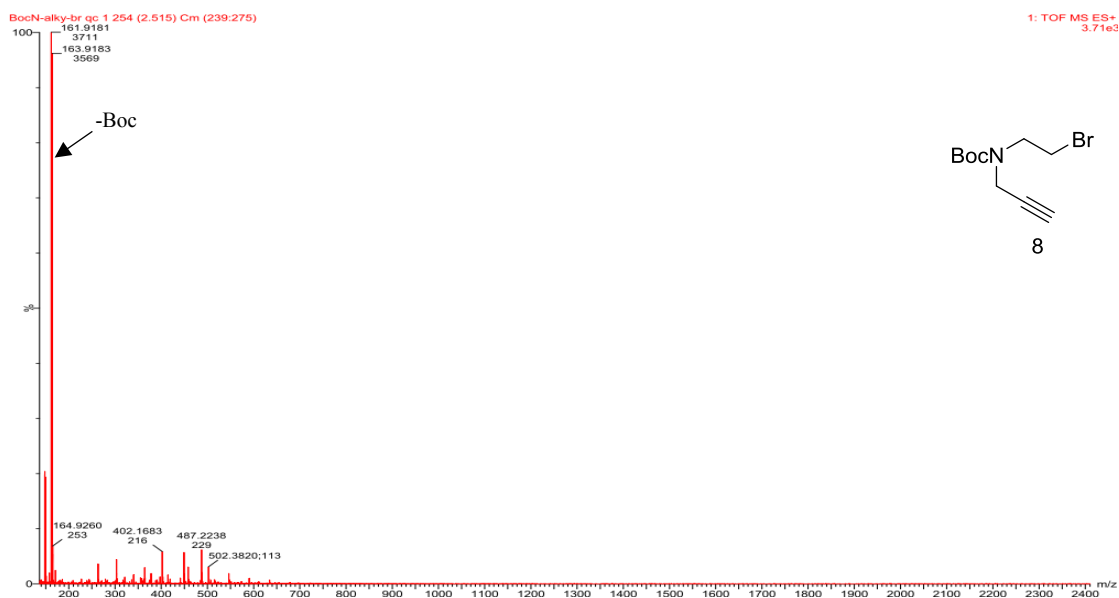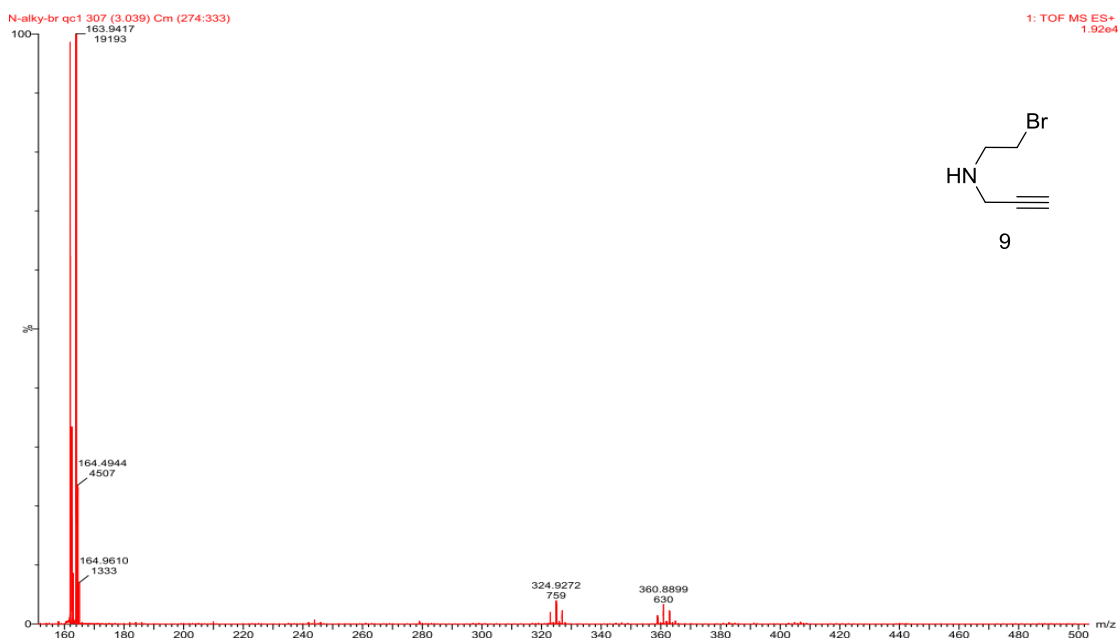

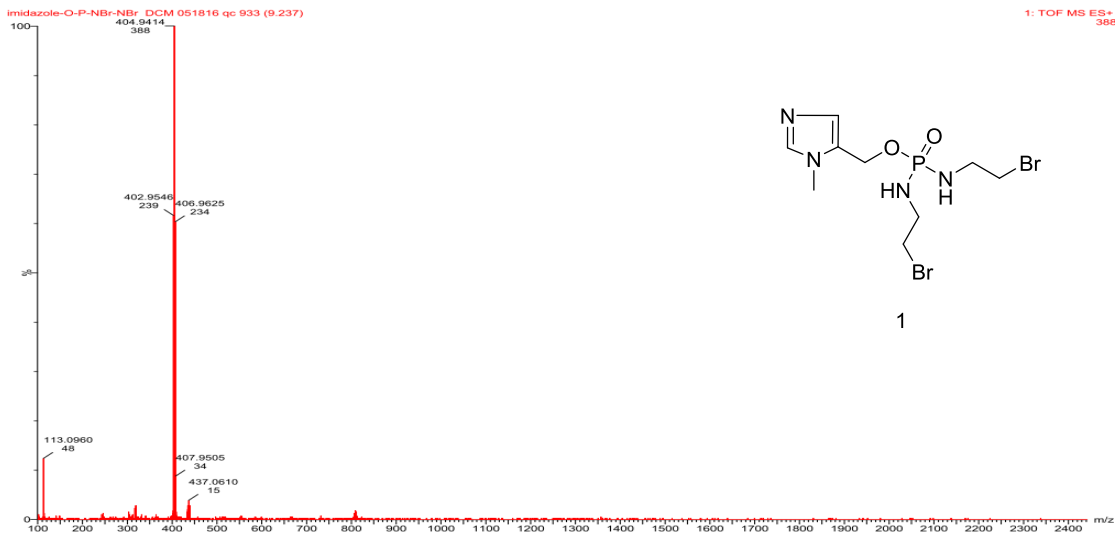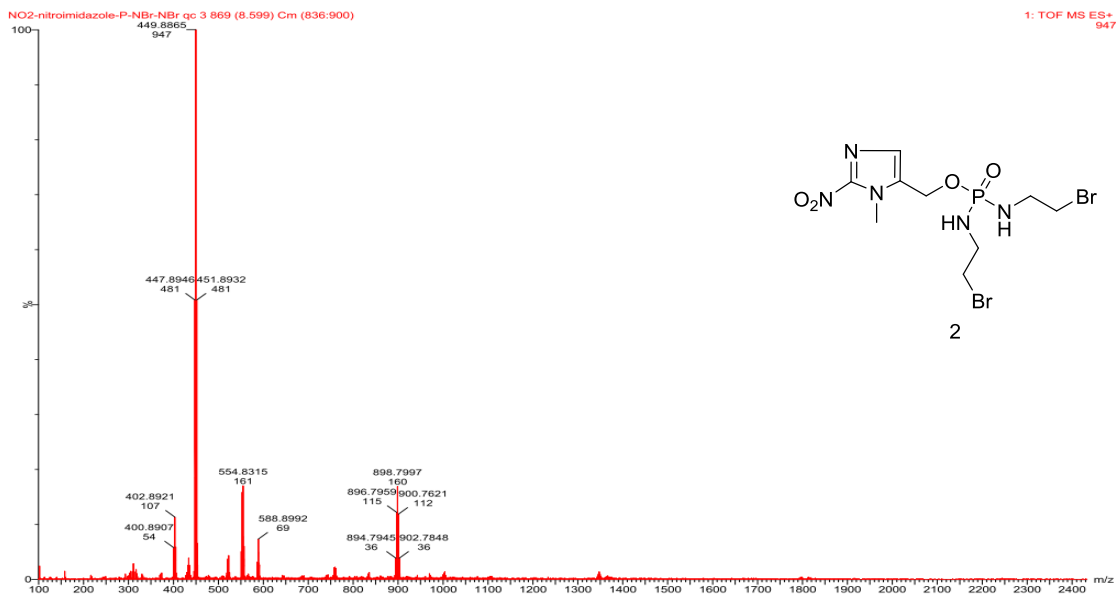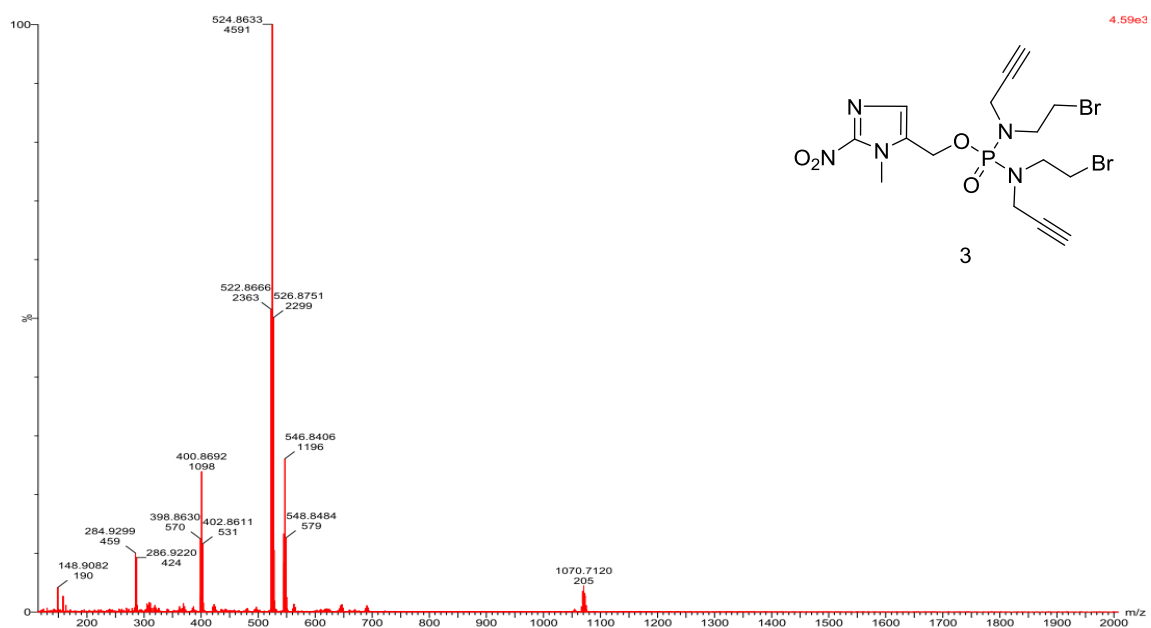



NBoc-OH CDCl<sub>3</sub> 1H

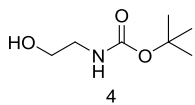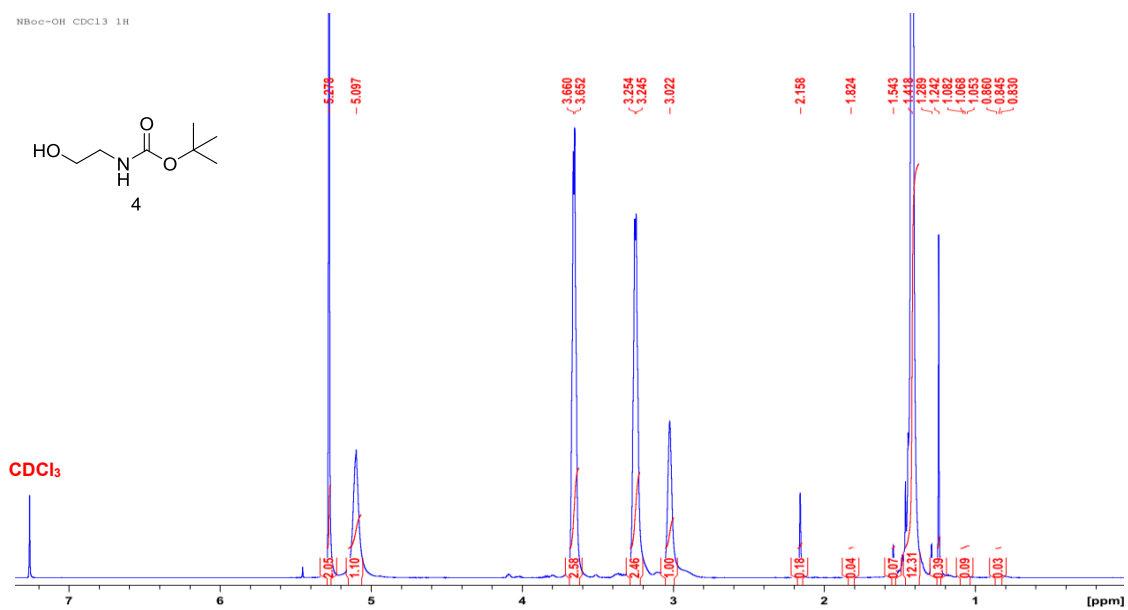

BocN-OTs 1H

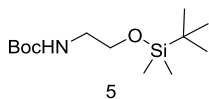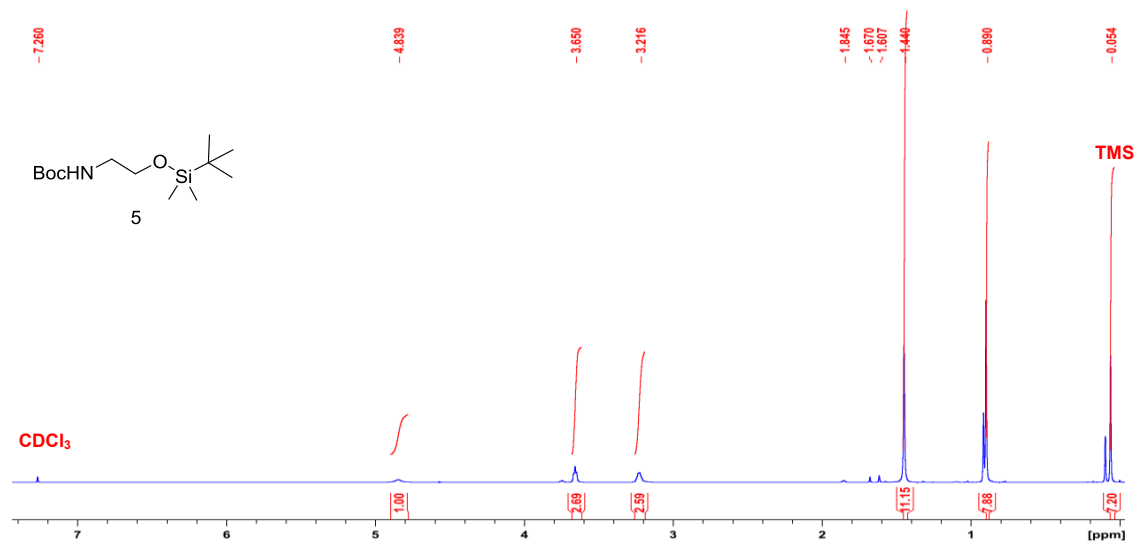

BocN-alky-OTs 1H

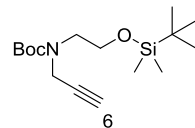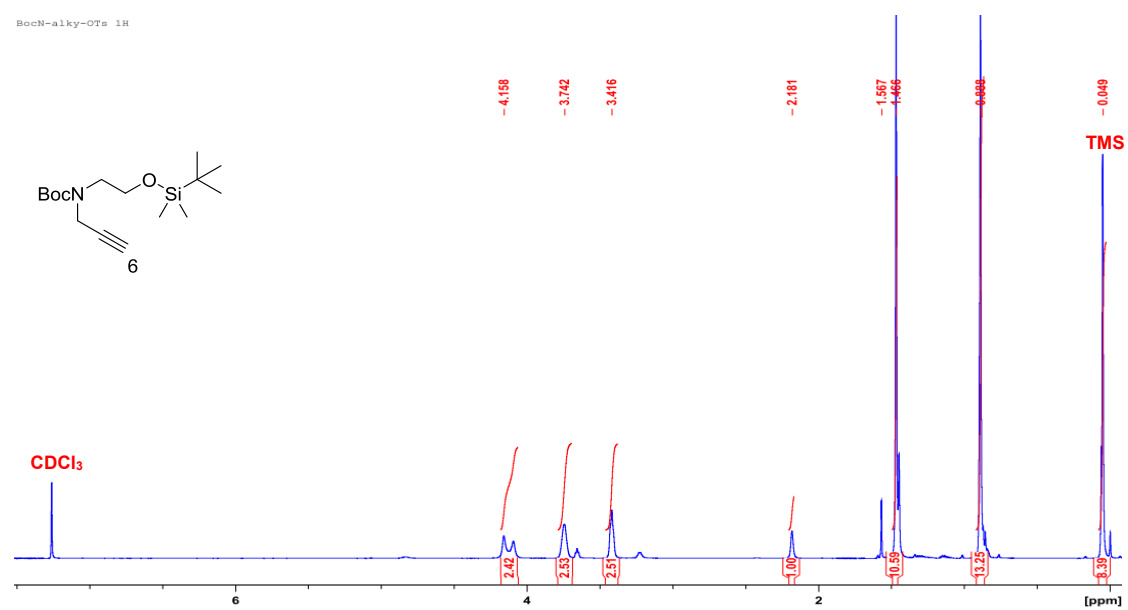

BocN-prop-OH

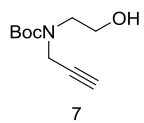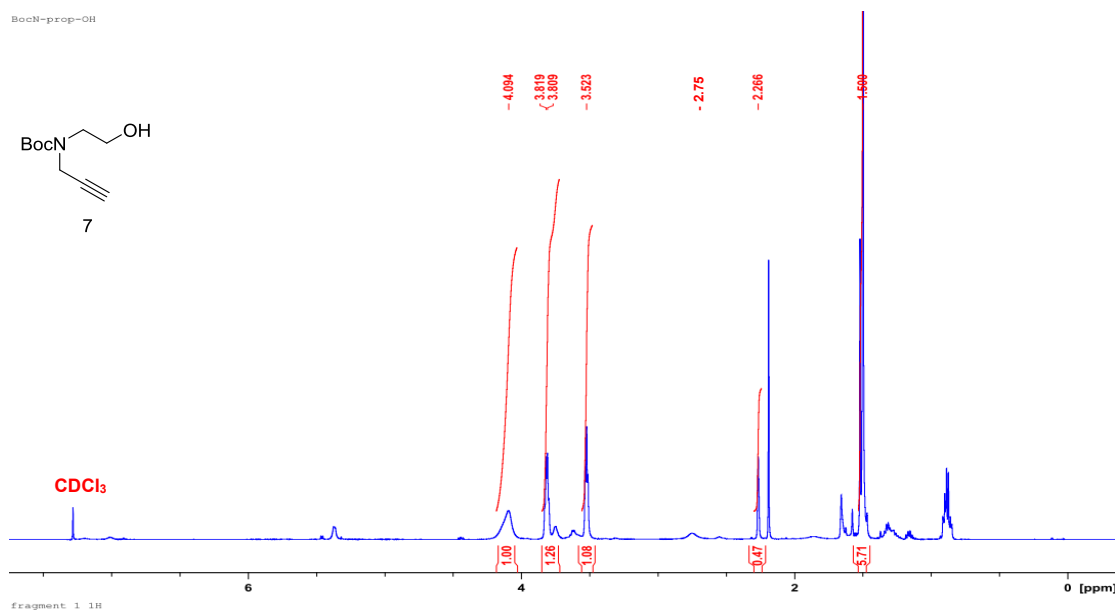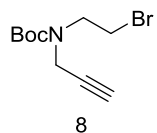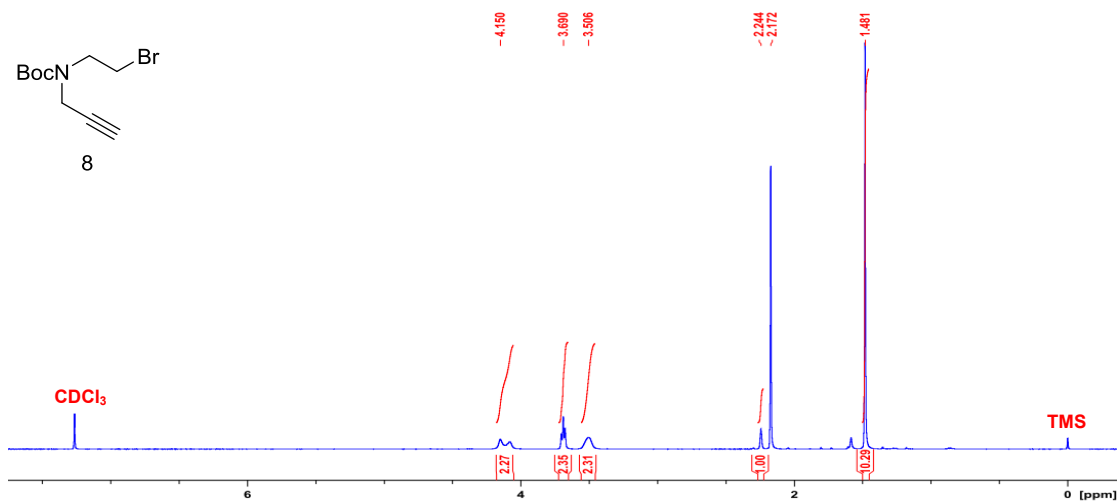

compound 6 1H dmsc

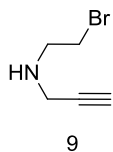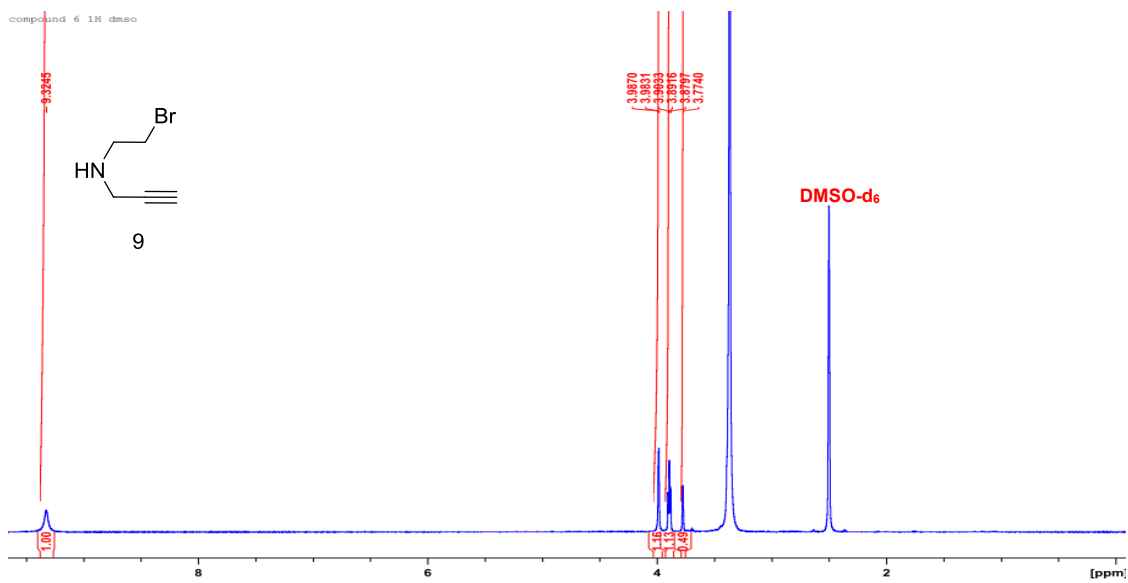

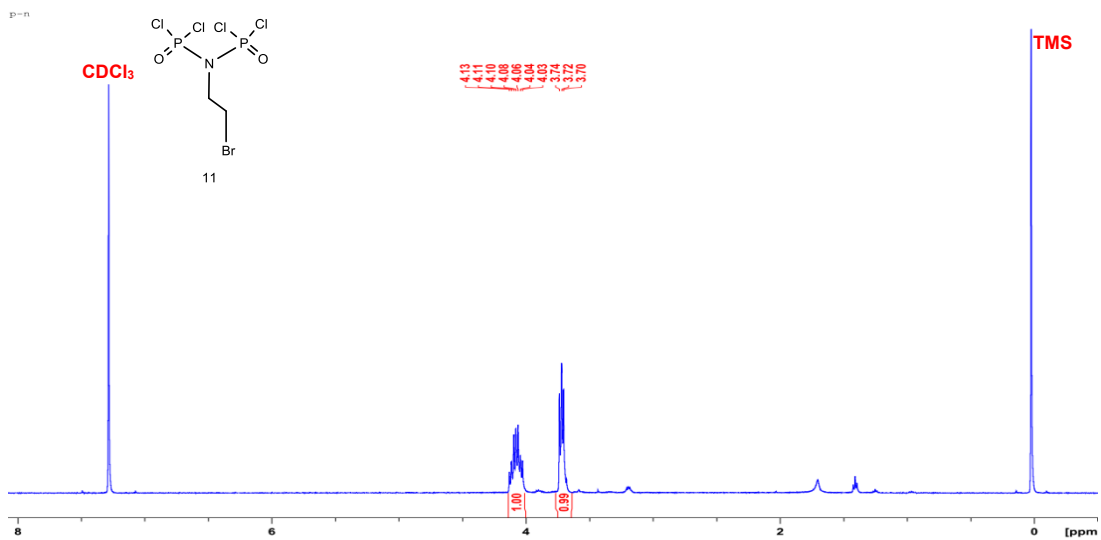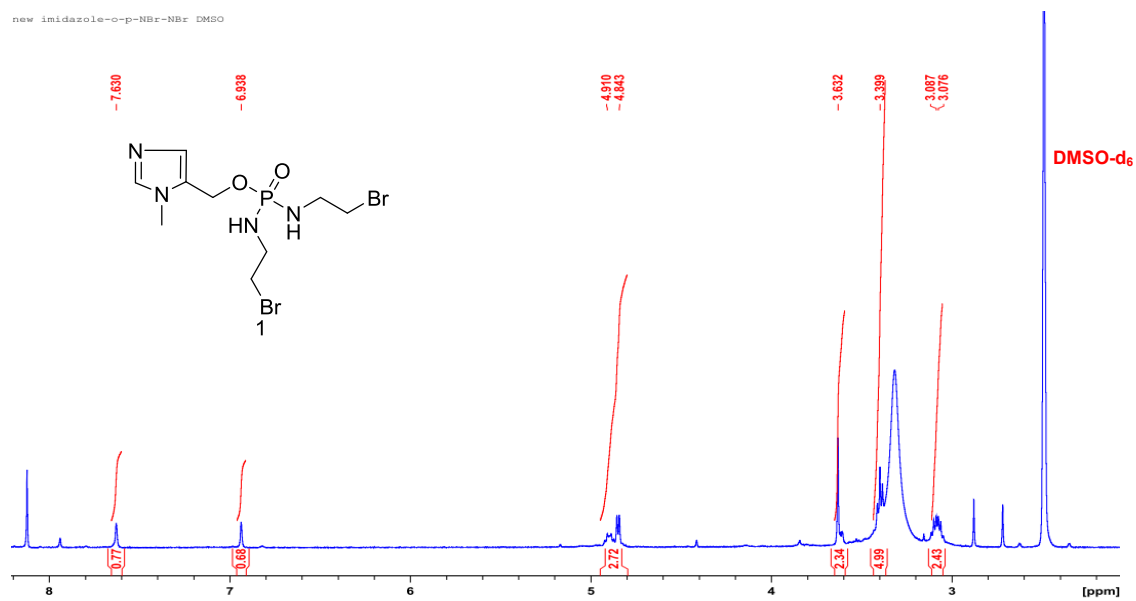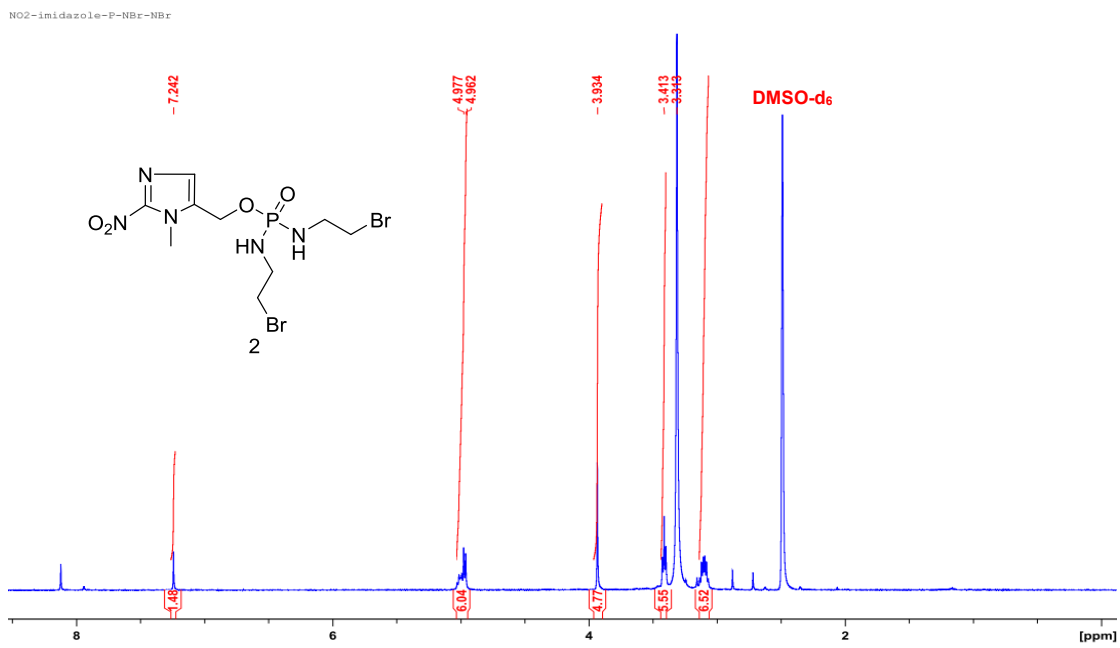



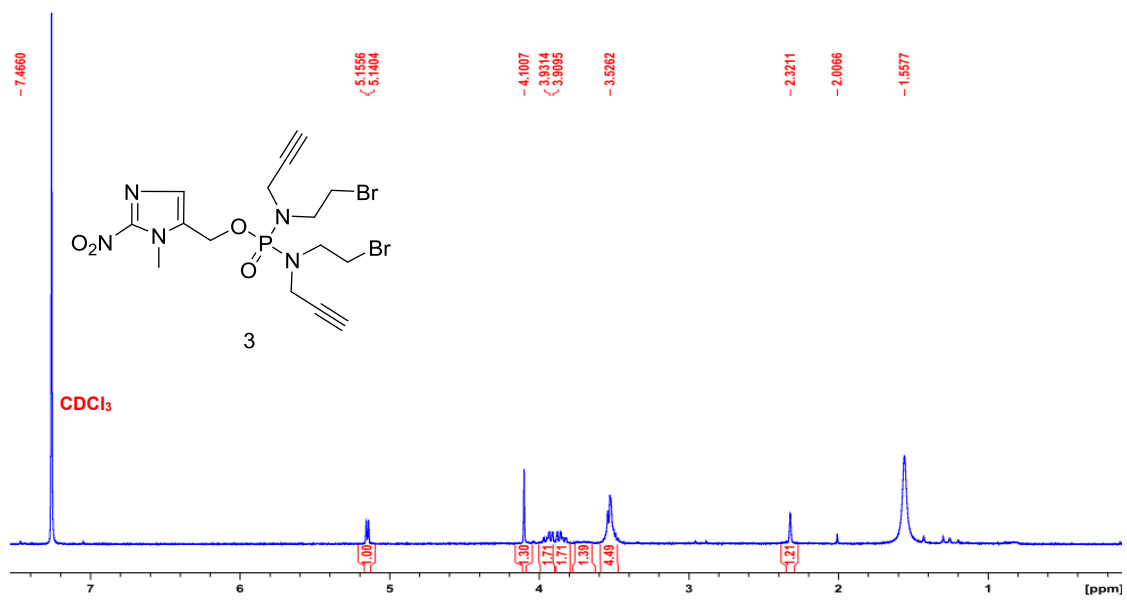

Fig. S3. <sup>1</sup>H-NMR spectra of compound 1-9 and 11.

BocN-OTs 13C

-155.578

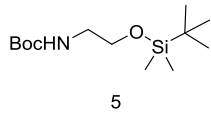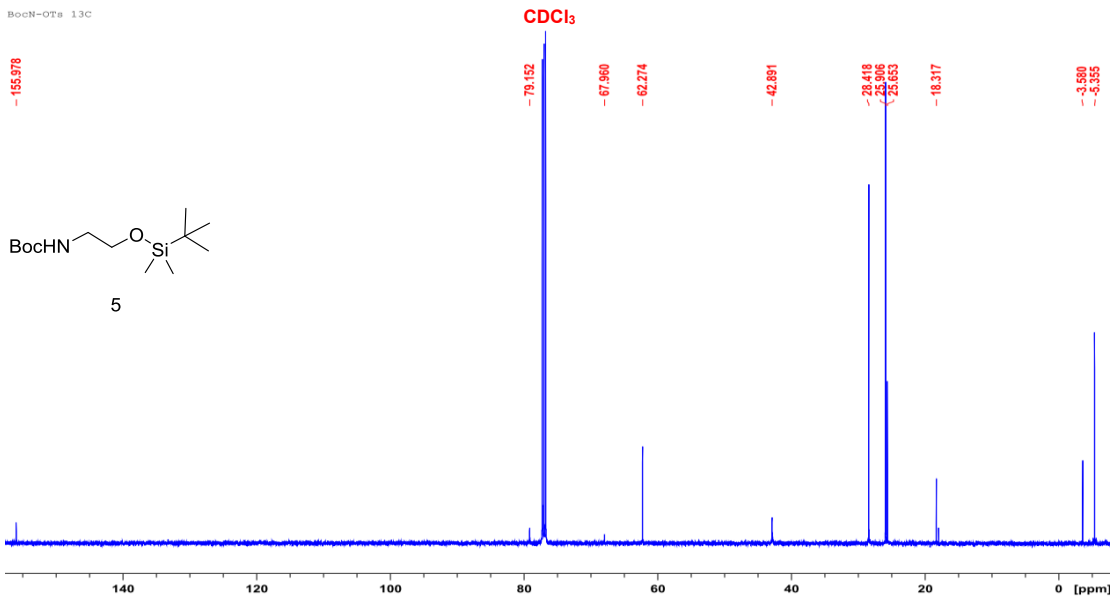

NBoc-alky-OTs 13C

-155.933

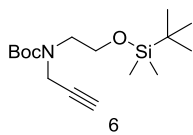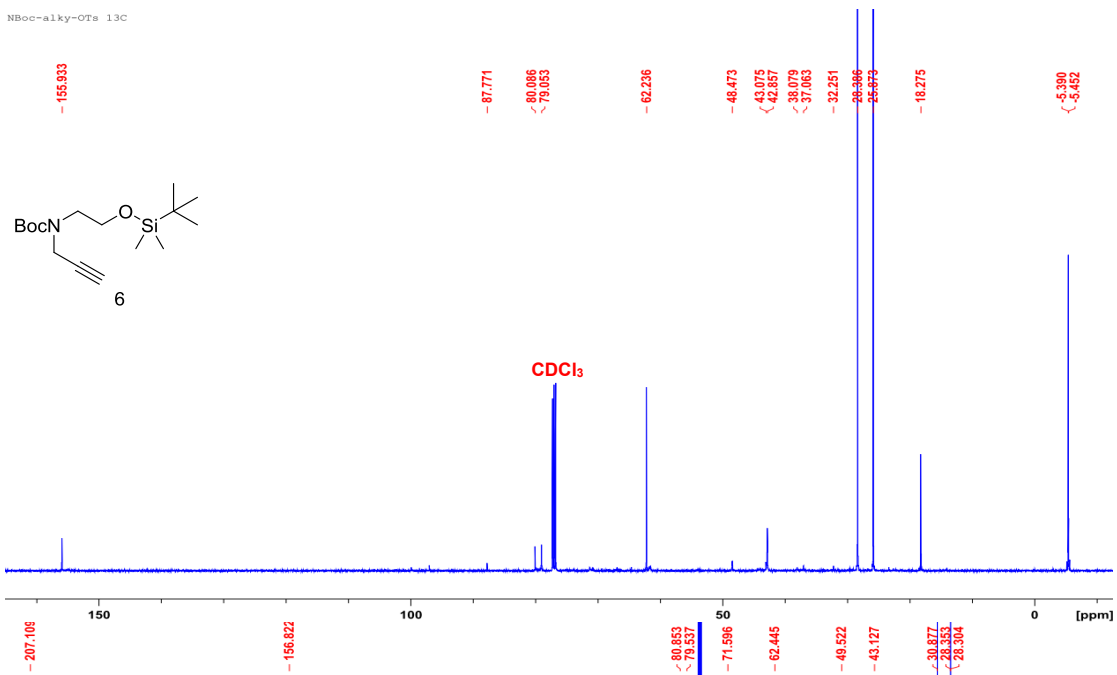

-207.105

-156.822

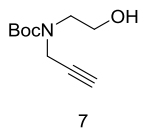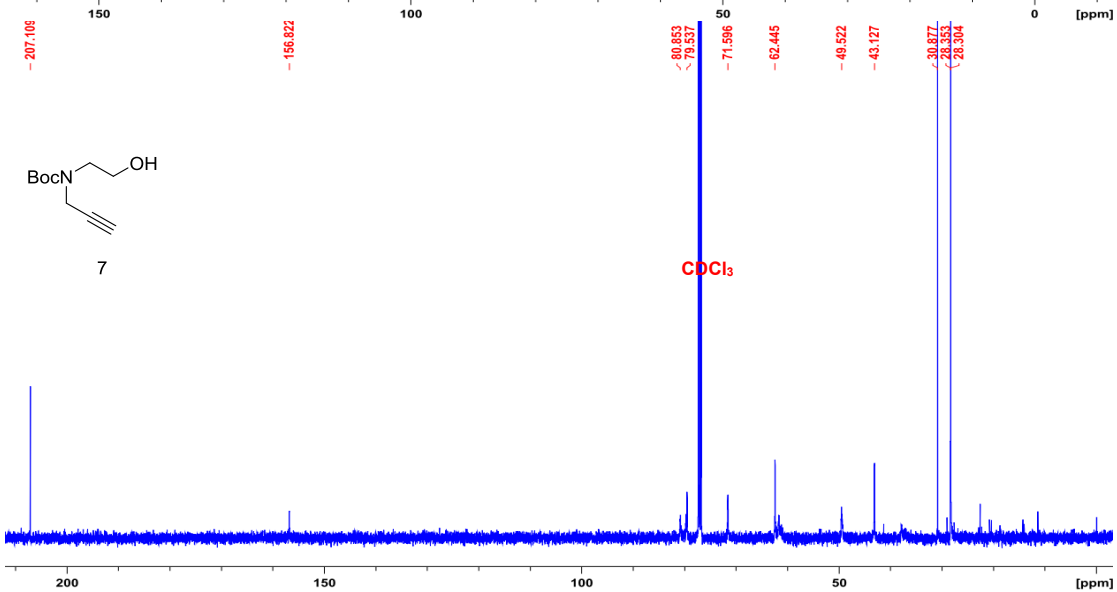

compound 6 13C DMSO

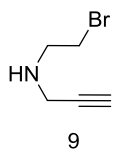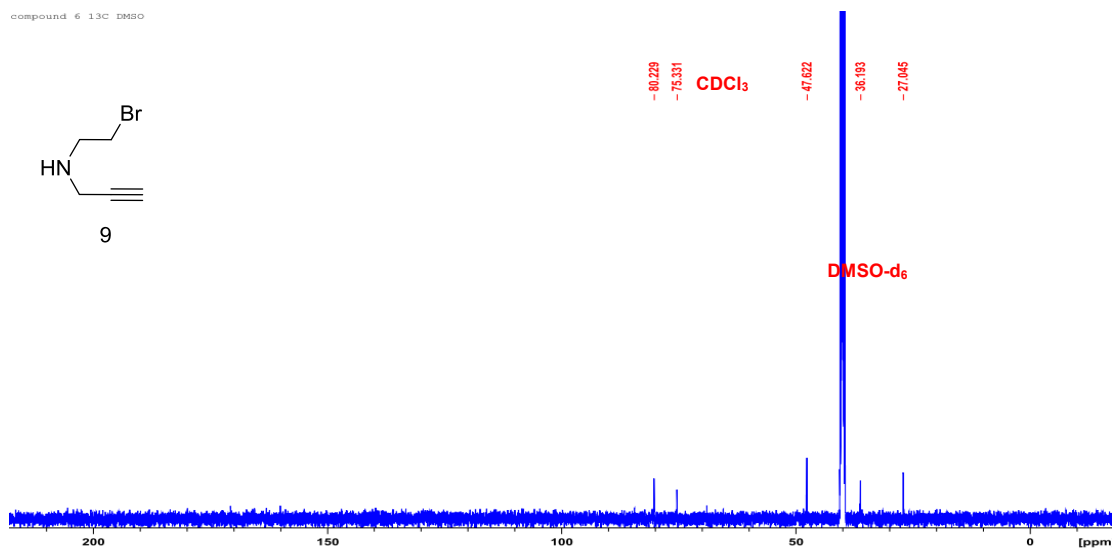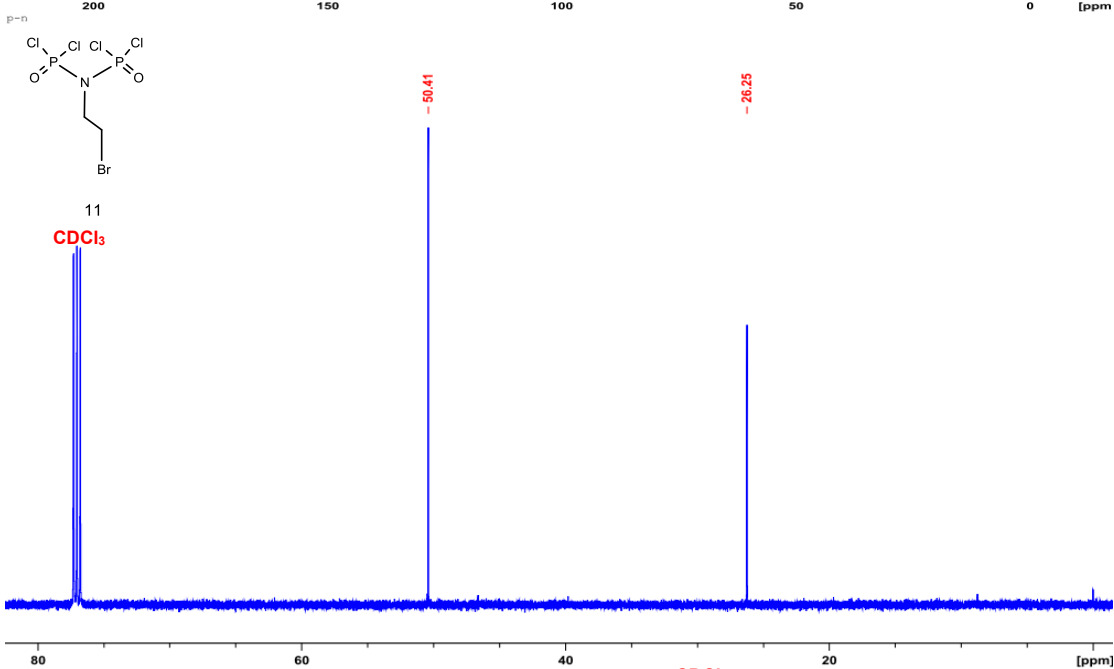

compound 3 13C-M chloroform

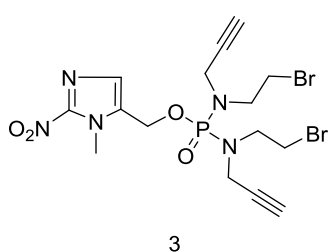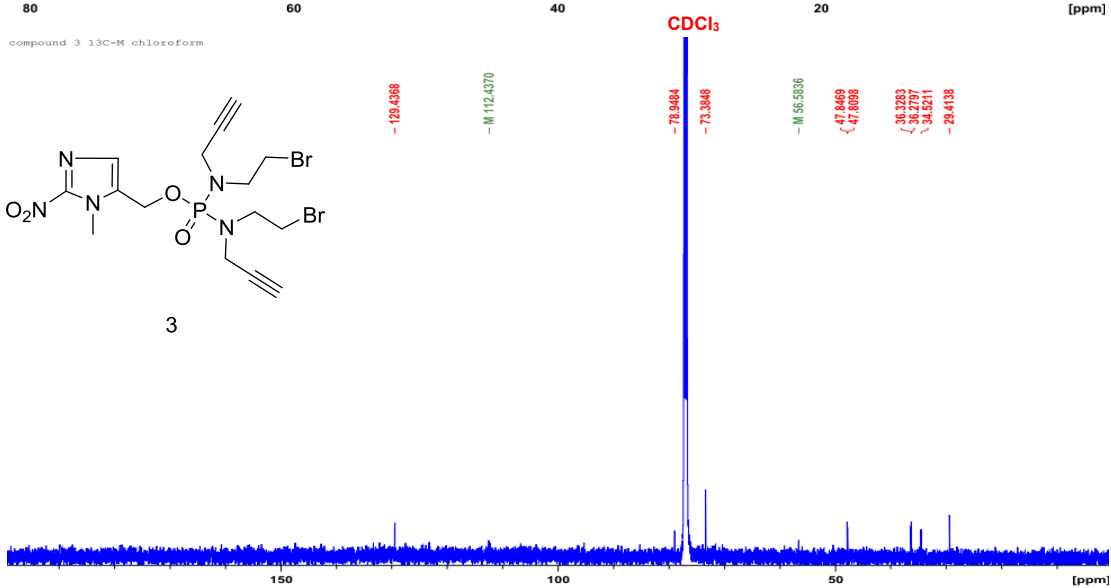

Fig. S4. <sup>13</sup>C-NMR spectra of compound 3, 5-7, 9 and 11.

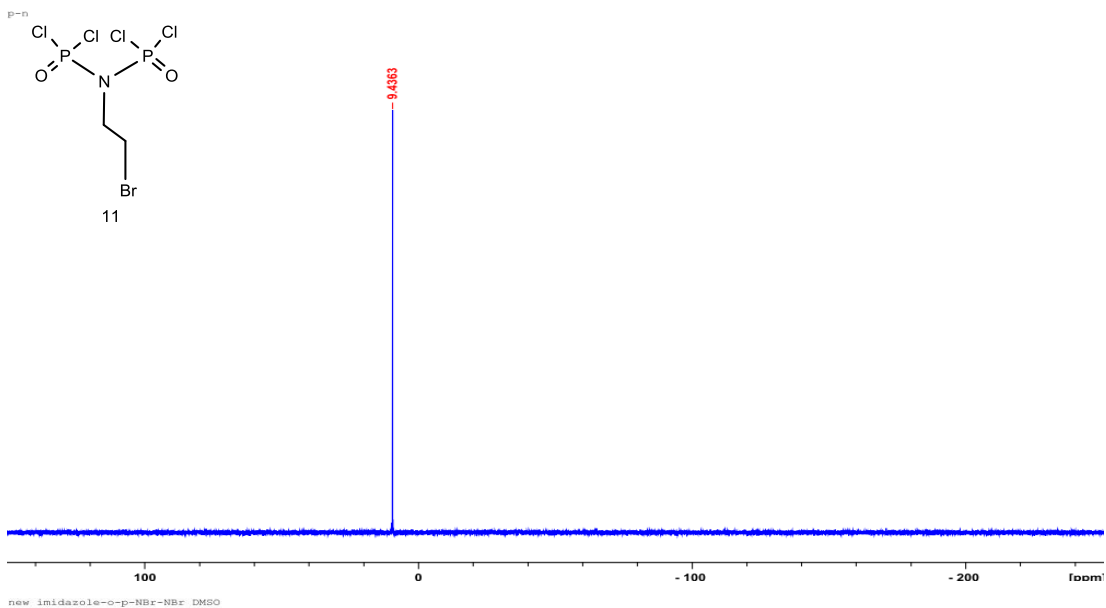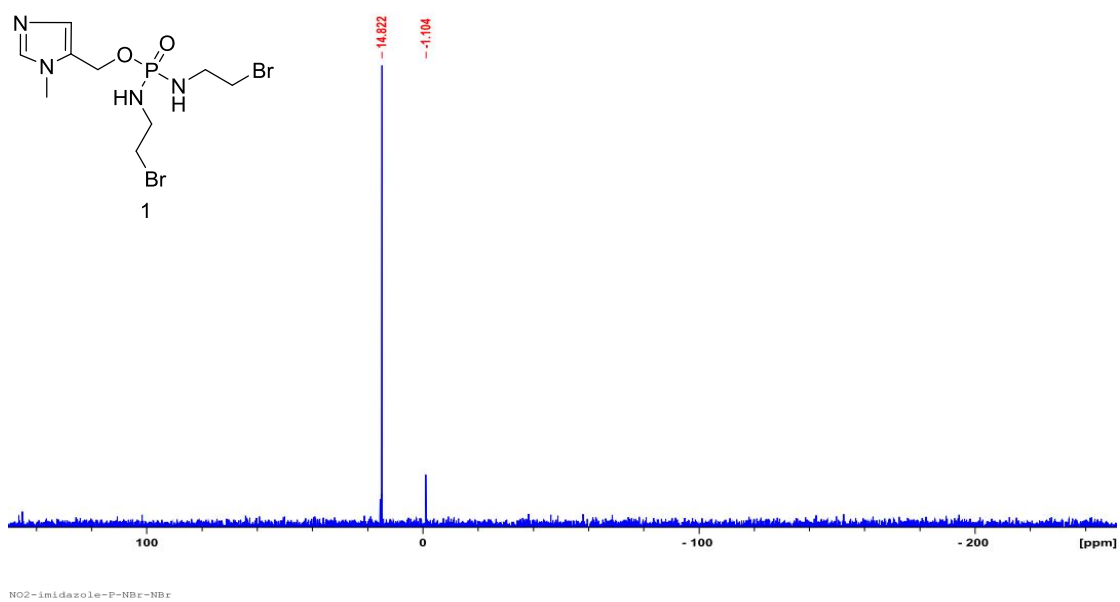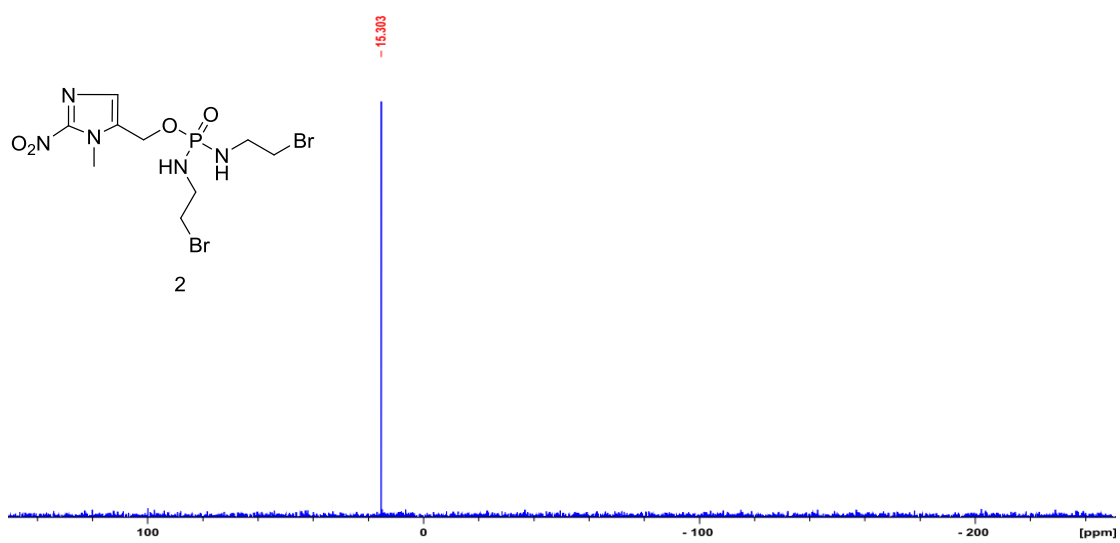

compound 3-2 chloroform 31P-M

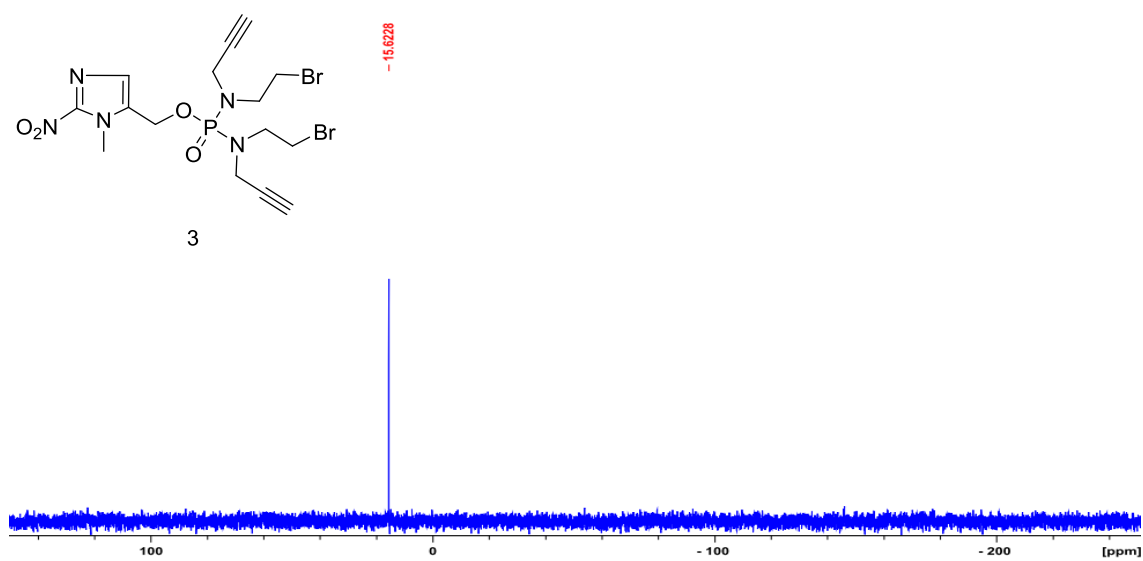

Fig. S5.  $^{31}\text{P}$ -NMR spectra of compound 1-3 and 11.
